# Supplementary material for: Craniofacial Morphology of Temporomandibular Disorder Patients with Different Disc Positions: Stratifying Features Based on Sex and Sagittal Skeletal Pattern
Source: MDPI journal article supplement (doi:10.3390/jcm12020652), 2023-01-13
Supplement: s1 [file s1]

**Table S1.** Stratified analysis based on sex

|                                     |        | Overall      | Normal       | DDwR         | DDwoR        | P value   | Post-hoc |
|-------------------------------------|--------|--------------|--------------|--------------|--------------|-----------|----------|
| 1. Cranial Base                     |        |              |              |              |              |           |          |
| Anterior cranial base length (mm)   | Female | 61.59±2.68   | 61.32±2.56   | 62.10±2.89   | 61.28±2.51   | 0.102     |          |
|                                     | Male   | 65.82±2.80   | 65.71±2.58   | 65.99±2.45   | 65.84±3.43   | 0.936     |          |
| Posterior cranial base length (mm)  | Female | 32.32±2.87   | 32.82±2.91   | 32.78±2.55   | 31.64±3.00   | 0.013*    | 1, 2 > 3 |
|                                     | Male   | 36.24±3.40   | 36.85±3.31   | 35.93±3.00   | 35.55±3.77   | 0.295     |          |
| Saddle angle (°)                    | Female | 124.88±5.28  | 125.83±5.62  | 124.12±4.92  | 125.01±5.35  | 0.191     |          |
|                                     | Male   | 124.67±5.18  | 124.47±5.76  | 123.57±5.15  | 124.67±5.18  | 0.323     |          |
| 2. Vertical relationship            |        |              |              |              |              |           |          |
| Anterior facial height (mm)         | Female | 113.60±5.90  | 113.36±4.97  | 113.53±6.88  | 113.81±5.49  | 0.904     |          |
|                                     | Male   | 120.90±6.44  | 120.69±6.40  | 119.85±6.78  | 122.06±6.33  | 0.507     |          |
| Posterior facial height (mm)        | Female | 75.11±5.11   | 76.40±4.76   | 76.26±4.75   | 73.37±5.17   | < 0.001** | 1, 2 > 3 |
|                                     | Male   | 84.18±6.36   | 86.01±5.82   | 82.72±5.90   | 82.49±6.97   | 0.047*    | NS       |
| Facial height index (%)             | Female | 66.21±4.66   | 67.48±4.49   | 67.31±4.53   | 64.53±4.39   | < 0.001** | 1, 2 > 3 |
|                                     | Male   | 69.75±5.68   | 71.38±5.25   | 69.11±4.61   | 67.72±6.48   | 0.034*    | 1 > 3    |
| Y axis angle (°)                    | Female | 61.02±3.47   | 61.34±3.39   | 60.58±3.49   | 61.23±3.48   | 0.366     |          |
|                                     | Male   | 61.22±3.95   | 61.13±3.60   | 59.38±3.52   | 62.84±4.24   | 0.012*    | 2 < 3    |
| Palatal plane angle (°)             | Female | -0.13±2.66   | -0.56±2.95   | -0.13±2.55   | 0.11±2.59    | 0.355     |          |
|                                     | Male   | 0.37±2.85    | 0.27±2.73    | 0.26±3.21    | 0.62±2.82    | 0.871     |          |
| Mandibular plane angle (FMA) (°)    | Female | 24.67±5.34   | 23.84±5.56   | 23.76±5.39   | 25.94±4.96   | 0.013*    | 1, 2 < 3 |
|                                     | Male   | 22.97±6.78   | 21.65±6.65   | 22.39±5.57   | 25.52±7.38   | 0.074     |          |
| Occlusal plane angle (°)            | Female | 8.42±3.86    | 8.42±3.76    | 7.99±3.61    | 8.80±4.12    | 0.398     |          |
|                                     | Male   | 8.02±4.83    | 7.43±4.15    | 6.76±4.34    | 9.95±5.72    | 0.050     | 2 < 3    |
| 3. Sagittal Relationship            |        |              |              |              |              |           |          |
| SNA (°)                             | Female | 82.56±3.38   | 82.53±3.32   | 83.07±3.19   | 82.12±3.55   | 0.185     |          |
|                                     | Male   | 83.20±3.96   | 84.52±3.83   | 83.15±3.52   | 81.18±3.75   | 0.003**   | 1 > 3    |
| SNB (°)                             | Female | 77.98±3.74   | 78.03±3.74   | 78.92±3.52   | 77.13±3.76   | 0.007**   | 1, 2 > 3 |
|                                     | Male   | 79.21±4.47   | 80.19±4.51   | 80.30±3.91   | 76.82±4.03   | 0.005**   | 1, 2 > 3 |
| ANB (°)                             | Female | 4.58±2.71    | 4.49±2.31    | 4.16±2.99    | 4.99±2.63    | 0.134     |          |
|                                     | Male   | 3.99±3.32    | 4.34±3.30    | 2.85±2.61    | 4.37±3.74    | 0.212     |          |
| Wits (mm)                           | Female | 0.49±3.63    | 0.63±2.99    | 0.13±3.88    | 0.74±3.76    | 0.523     |          |
|                                     | Male   | 0.93±4.42    | 0.93±4.41    | -0.60±3.84   | 0.80±5.14    | 0.445     |          |
| 4. Mandible position and morphology |        |              |              |              |              |           |          |
| Mandibular arc angle (°)            | Female | 37.14±5.22   | 38.48±5.42   | 37.82±4.77   | 35.79±5.22   | 0.004**   | 1, 2 > 3 |
|                                     | Male   | 38.06±5.67   | 39.00±5.42   | 36.92±4.51   | 37.53±6.76   | 0.354     |          |
| Mandibular body length (mm)         | Female | 68.34±4.25   | 68.22±3.61   | 69.05±4.47   | 67.78±4.34   | 0.150     |          |
|                                     | Male   | 72.90±5.39   | 72.93±5.29   | 73.82±3.92   | 72.10±6.54   | 0.573     |          |
| Ramus height (mm)                   | Female | 45.21±3.97   | 46.24±3.69   | 45.93±3.72   | 44.00±4.04   | 0.001**   | 1, 2 > 3 |
|                                     | Male   | 51.00±5.09   | 52.38±4.85   | 49.97±5.22   | 49.68±5.00   | 0.067     |          |
| Articular angle (°)                 | Female | 151.69±6.85  | 150.58±6.85  | 151.49±5.94  | 152.50±7.55  | 0.264     |          |
|                                     | Male   | 149.92±6.84  | 149.45±6.85  | 149.15±7.10  | 151.27±6.70  | 0.500     |          |
| Gonial angle (°)                    | Female | 117.99±6.08  | 116.85±5.65  | 117.49±5.98  | 119.07±6.29  | 0.076     |          |
|                                     | Male   | 116.26±7.13  | 115.25±7.71  | 117.94±6.23  | 116.26±7.13  | 0.391     |          |
| 5. Dental Relationship              |        |              |              |              |              |           |          |
| Interincisal Angle (°)              | Female | 126.85±13.16 | 126.44±14.19 | 126.72±14.15 | 127.20±11.72 | 0.942     |          |
|                                     | Male   | 128.28±13.34 | 126.49±12.41 | 128.61±14.27 | 130.79±14.07 | 0.455     |          |
| IMPA (°)                            | Female | 96.39±7.87   | 97.73±7.77   | 96.88±8.61   | 95.19±7.14   | 0.144     |          |
|                                     | Male   | 97.57±9.34   | 100.07±8.43  | 95.17±9.38   | 95.61±10.02  | 0.072     |          |
| FMIA (°)                            | Female | 58.95±9.13   | 58.45±8.60   | 59.36±9.90   | 58.87±8.80   | 0.854     |          |
|                                     | Male   | 59.46±9.86   | 58.30±7.90   | 62.46±9.92   | 58.86±12.23  | 0.292     |          |

|               |        |           |           |           |           |       |
|---------------|--------|-----------|-----------|-----------|-----------|-------|
| Overbite (mm) | Female | 2.51±2.00 | 2.51±2.15 | 2.59±1.76 | 2.43±2.14 | 0.875 |
|               | Male   | 2.75±2.72 | 2.65±2.60 | 2.25±2.05 | 3.29±3.31 | 0.428 |
| Overjet (mm)  | Female | 4.10±1.79 | 4.16±2.16 | 3.88±1.72 | 4.26±1.60 | 0.362 |
|               | Male   | 3.82±2.30 | 3.77±2.62 | 3.40±2.09 | 4.23±1.90 | 0.481 |

Data presented by mean ± SD; NS no significance, \* P value<0.05; \*\* P value<0.01.

**Table S2.** Stratified analysis based on sagittal skeletal pattern

|                                            |           | Overall     | Normal      | DDwR        | DDwoR       | P value   | Post-hoc |
|--------------------------------------------|-----------|-------------|-------------|-------------|-------------|-----------|----------|
| <b>1. Cranial Base</b>                     |           |             |             |             |             |           |          |
| Anterior cranial base length (mm)          | Class I   | 63.06±3.51  | 63.54±3.43  | 63.47±3.63  | 62.12±3.33  | 0.077     |          |
|                                            | Class II  | 62.26±3.11  | 62.92±3.30  | 61.91±2.61  | 62.09±3.28  | 0.349     |          |
|                                            | Class III | 63.43±2.80  | 62.50±3.39  | 63.32±2.20  | 64.51±2.97  | 0.364     |          |
| Posterior cranial base length (mm)         | Class I   | 33.83±3.36  | 34.65±3.37  | 33.66±2.99  | 33.18±3.61  | 0.088     |          |
|                                            | Class II  | 32.82±3.50  | 34.05±4.15  | 33.12±2.45  | 31.95±3.47  | 0.018*    | 1 > 3    |
|                                            | Class III | 33.83±3.85  | 36.19±3.20  | 33.28±3.97  | 32.31±3.55  | 0.103     |          |
| Saddle angle (°)                           | Class I   | 124.84±4.87 | 125.26±5.66 | 123.76±4.59 | 125.56±4.15 | 0.143     |          |
|                                            | Class II  | 125.05±5.58 | 125.10±5.91 | 125.47±5.00 | 124.77±5.79 | 0.839     |          |
|                                            | Class III | 123.69±5.61 | 125.74±5.65 | 120.68±4.78 | 126.16±5.13 | 0.042*    | NS       |
| <b>2. Vertical relationship</b>            |           |             |             |             |             |           |          |
| Anterior facial height (mm)                | Class I   | 115.34±6.89 | 116.04±6.49 | 115.06±7.34 | 114.92±6.89 | 0.684     |          |
|                                            | Class II  | 116.18±6.53 | 117.76±6.88 | 115.21±6.53 | 115.89±6.28 | 0.242     |          |
|                                            | Class III | 114.55±8.20 | 114.59±7.09 | 112.53±9.26 | 117.56±7.55 | 0.420     |          |
| Posterior facial height (mm)               | Class I   | 78.77±6.68  | 80.97±7.05  | 78.41±5.61  | 76.90±6.84  | 0.009**   | 1 > 3    |
|                                            | Class II  | 76.08±6.44  | 79.49±7.02  | 76.43±4.56  | 73.95±6.31  | < 0.001** | 1 > 2, 3 |
|                                            | Class III | 78.55±7.99  | 82.51±7.76  | 77.34±8.01  | 76.41±7.74  | 0.253     |          |
| Facial height index (%)                    | Class I   | 68.34±4.78  | 69.80±4.94  | 68.25±4.36  | 66.94±4.70  | 0.012*    | 1 > 3    |
|                                            | Class II  | 65.54±0.50  | 67.52±4.66  | 66.48±4.62  | 63.86±4.94  | 0.001**   | 1, 2 > 3 |
|                                            | Class III | 68.67±6.26  | 72.15±7.07  | 68.78±5.04  | 65.04±5.68  | 0.070     |          |
| Y axis angle (°)                           | Class I   | 60.29±3.24  | 60.61±3.34  | 59.87±3.25  | 60.42±3.13  | 0.502     |          |
|                                            | Class II  | 62.64±3.37  | 62.55±3.22  | 61.93±3.26  | 63.12±3.49  | 0.244     |          |
|                                            | Class III | 58.08±3.27  | 59.79±3.97  | 57.54±3.22  | 57.16±2.08  | 0.213     |          |
| Palatal plane angle (°)                    | Class I   | -0.09±2.68  | -0.21±2.88  | -0.12±2.58  | 0.06±2.63   | 0.880     |          |
|                                            | Class II  | 0.10±2.69   | -0.29±2.57  | -0.31±2.86  | 0.57±2.61   | 0.188     |          |
|                                            | Class III | 0.09±3.13   | 0.20±4.16   | 1.01±2.54   | -1.39±2.52  | 0.250     |          |
| Mandibular plane angle (FMA) (°)           | Class I   | 22.81±5.39  | 21.98±6.11  | 22.74±5.19  | 23.75±4.72  | 0.268     |          |
|                                            | Class II  | 26.26±5.69  | 24.62±5.30  | 25.06±5.75  | 27.92±5.50  | 0.008**   | 1, 2 < 3 |
|                                            | Class III | 22.09±5.80  | 21.33±8.28  | 21.90±4.62  | 23.15±5.07  | 0.822     |          |
| Occlusal plane angle (°)                   | Class I   | 7.52±4.05   | 7.61±4.28   | 7.45±3.73   | 7.50±4.22   | 0.980     |          |
|                                            | Class II  | 9.63±3.95   | 8.98±2.96   | 8.66±3.79   | 10.59±4.35  | 0.037*    | NS       |
|                                            | Class III | 6.45±3.85   | 6.26±4.81   | 6.21±3.55   | 7.01±3.69   | 0.895     |          |
| <b>3. Sagittal Relationship</b>            |           |             |             |             |             |           |          |
| SNA (°)                                    | Class I   | 82.33±3.45  | 82.92±3.73  | 82.51±3.30  | 81.55±3.25  | 0.134     |          |
|                                            | Class II  | 83.59±3.51  | 84.38±3.58  | 84.32±2.93  | 82.71±3.64  | 0.020*    | NS       |
|                                            | Class III | 80.93±3.34  | 82.20±3.07  | 81.86±2.95  | 78.26±2.93  | 0.021*    | 1, 2 > 3 |
| SNB (°)                                    | Class I   | 79.04±3.51  | 79.37±3.96  | 79.41±3.22  | 78.32±3.26  | 0.223     |          |
|                                            | Class II  | 76.64±3.71  | 77.40±3.83  | 77.51±3.05  | 75.68±3.84  | 0.025*    | NS       |
|                                            | Class III | 82.23±3.77  | 82.95±4.47  | 83.38±3.39  | 79.76±2.61  | 0.084     |          |
| ANB (°)                                    | Class I   | 3.29±1.09   | 3.54±1.14   | 3.11±1.00   | 3.23±1.11   | 0.125     |          |
|                                            | Class II  | 6.96±1.62   | 6.99±1.90   | 6.81±1.56   | 7.04±1.51   | 0.794     |          |
|                                            | Class III | -1.30±1.92  | -0.74±2.21  | -1.53±1.58  | -1.54±2.21  | 0.631     |          |
| Wits (mm)                                  | Class I   | -0.43±2.76  | 0.08±2.85   | -0.70±2.54  | -0.50±2.90  | 0.518     |          |
|                                            | Class II  | 2.99±2.98   | 3.28±3.13   | 2.94±2.74   | 2.86±3.08   | 0.811     |          |
|                                            | Class III | -5.93±3.02  | -4.50±1.74  | -6.02±3.06  | -7.24±3.62  | 0.195     |          |
| <b>4. Mandible position and morphology</b> |           |             |             |             |             |           |          |
| Mandibular arc angle (°)                   | Class I   | 38.20±5.60  | 39.20±5.40  | 38.02±5.09  | 37.36±6.23  | 0.263     |          |
|                                            | Class II  | 36.34±4.94  | 37.86±5.42  | 37.27±3.88  | 34.92±4.91  | 0.009**   | 1, 2 > 3 |
|                                            | Class III | 38.01±5.21  | 39.20±5.51  | 37.10±5.53  | 38.19±4.83  | 0.689     |          |
| Mandibular body length (mm)                | Class I   | 70.59±4.95  | 70.94±4.66  | 70.89±4.68  | 69.92±5.54  | 0.521     |          |
|                                            | Class II  | 67.80±4.46  | 68.98±5.11  | 67.88±4.26  | 67.09±4.11  | 0.148     |          |
|                                            | Class III | 72.54±5.10  | 71.39±5.89  | 72.66±4.29  | 73.53±5.84  | 0.716     |          |
|                                            | Class I   | 47.70±4.91  | 49.32±5.47  | 47.37±4.33  | 46.40±4.52  | 0.011*    | 1 > 2, 3 |

|                        |           |              |              |              |              |           |          |
|------------------------|-----------|--------------|--------------|--------------|--------------|-----------|----------|
| Ramus height (mm)      | Class II  | 45.53±4.62   | 47.87±4.33   | 45.86±3.84   | 44.02±4.68   | < 0.001** | 1 > 2, 3 |
|                        | Class III | 47.96±6.14   | 50.58±6.60   | 46.76±5.71   | 47.15±6.28   | 0.372     |          |
| Articular angle (°)    | Class I   | 150.32±6.23  | 149.46±5.59  | 151.08±6.49  | 150.39±6.58  | 0.429     |          |
|                        | Class II  | 152.98±7.17  | 152.54±7.46  | 151.09±5.90  | 154.38±7.52  | 0.087     |          |
|                        | Class III | 147.72±6.86  | 143.86±7.00  | 150.50±6.52  | 147.40±5.95  | 0.102     |          |
| Gonial angle (°)       | Class I   | 116.76±6.55  | 115.73±6.54  | 116.86±6.27  | 117.70±6.84  | 0.334     |          |
|                        | Class II  | 118.05±6.13  | 116.32±6.51  | 118.31±5.51  | 118.86±6.18  | 0.155     |          |
|                        | Class III | 119.02±6.78  | 118.15±8.12  | 118.45±6.43  | 120.75±6.44  | 0.707     |          |
| 5. Dental Relationship |           |              |              |              |              |           |          |
| Interincisal Angle (°) | Class I   | 128.50±12.99 | 128.60±12.93 | 127.37±13.60 | 129.61±12.55 | 0.694     |          |
|                        | Class II  | 124.11±13.00 | 122.26±13.63 | 124.09±14.46 | 125.15±11.75 | 0.596     |          |
|                        | Class III | 134.95±11.22 | 130.69±11.97 | 135.03±13.12 | 139.09±5.62  | 0.338     |          |
| IMPA (°)               | Class I   | 95.53±7.43   | 97.37±8.07   | 95.89±7.74   | 93.27±5.78   | 0.021*    | 1 > 3    |
|                        | Class II  | 100.29±6.96  | 102.34±6.18  | 100.91±7.51  | 98.77±6.78   | 0.049*    | NS       |
|                        | Class III | 86.61±8.44   | 92.25±9.49   | 86.18±6.99   | 81.64±6.59   | 0.034*    | 1 > 3    |
| FMIA (°)               | Class I   | 61.66±7.95   | 60.67±7.30   | 61.38±8.90   | 62.98±7.48   | 0.344     |          |
|                        | Class II  | 53.44±7.15   | 53.05±6.51   | 54.02±7.91   | 53.31±7.11   | 0.839     |          |
|                        | Class III | 71.30±7.03   | 66.43±7.98   | 71.94±6.19   | 75.21±4.60   | 0.033*    |          |
| Overbite (mm)          | Class I   | 2.58±2.20    | 2.57±2.18    | 2.28±1.58    | 2.91±2.72    | 0.364     |          |
|                        | Class II  | 2.80±2.15    | 2.93±2.29    | 2.94±2.04    | 2.63±2.16    | 0.730     |          |
|                        | Class III | 1.50±2.42    | 1.11±3.17    | 2.27±1.99    | 0.74±2.12    | 0.345     |          |
| Overjet (mm)           | Class I   | 3.87±1.44    | 3.81±1.74    | 3.74±1.22    | 4.07±1.32    | 0.487     |          |
|                        | Class II  | 4.68±1.92    | 4.95±2.47    | 4.53±1.67    | 4.62±1.72    | 0.628     |          |
|                        | Class III | 1.84±2.56    | 1.16±2.94    | 1.71±2.61    | 2.70±2.12    | 0.490     |          |

Data presented by mean ± SD; NS no significance, \* P value<0.05; \*\* P value<0.01.
